# Supplementary material
Source: PubMed Central journal article supplement (PMC34323)
Supplement: pnas_97_9_4541__1.pdf [file pnas_97_9_4541__1.pdf]

## Appendix B: Relation between PMD vectors $\vec{\tau}$ and $\vec{\Omega}$

In the main body of this text we have defined the PMD vector  $\vec{\tau}$  to characterize the fiber and derive the major PMD laws. To conform with most of the optics literature (9) and the available measurement instrumentation we are using “right-circular” Stokes space, where the Stokes parameter

$$s_3 = \langle s | \sigma_3 | s \rangle \quad [\text{B.1}]$$

is unity and positive for right-handed circular polarization.

The PMD vector  $\vec{\Omega}$  defined and introduced by Poole *et al.* (2, 3) is widely used in the PMD literature, and this appendix serves to connect  $\vec{\tau}$  and  $\vec{\Omega}$ .

The vectors  $\vec{\tau}$  and  $\vec{\Omega}$  are different in two respects. The first is that  $\vec{\Omega}$  is defined in “left-circular” Stokes space, where the  $s_3$  Stokes parameter is unity and positive for left-handed circular polarization (and  $-1$  for right-circular light).

The second distinction is that  $\vec{\tau}$  is defined to point into the direction of the slow PSP with group delay

$$\tau_g = \tau_0 + \Delta\tau/2, \quad [\text{B.2}]$$

while  $\vec{\Omega}$  is defined to point into the direction of the fast PSP with group delay

$$\tau_g = \tau_0 - \Delta\tau/2. \quad [\text{B.3}]$$

These two differences combine to ensure that the basic law of infinitesimal rotation (6.11) has the same form and sign for both  $\vec{\tau}$  and  $\vec{\Omega}$ . However, the Stokes vectors of the two spaces are not the same, and the relation between the PMD vectors is given by

$$\vec{\tau} = \begin{pmatrix} \tau_1 \\ \tau_2 \\ \tau_3 \end{pmatrix}; \quad \vec{\bar{\Omega}} = \begin{pmatrix} -\tau_1 \\ -\tau_2 \\ \tau_3 \end{pmatrix}, \quad [\text{B.4}]$$

where  $\vec{\tau}$  is in right-circular Stokes space, and  $\vec{\bar{\Omega}}$  is in left-circular Stokes space. Our birefringence vector  $\vec{\bar{\beta}}$ , defined in Eq. 6.2, and the birefringence vector  $\vec{W}$  often used in the literature (19) are related in a similar way as  $\vec{\tau}$  and  $\vec{\bar{\Omega}}$ . We have

$$\vec{\bar{\beta}} = \begin{pmatrix} \beta_1 \\ \beta_2 \\ \beta_3 \end{pmatrix}; \quad \vec{W} = \begin{pmatrix} -\beta_1 \\ -\beta_2 \\ \beta_3 \end{pmatrix}, \quad [\text{B.5}]$$

with  $\vec{\bar{\beta}}$  in right-circular and  $\vec{W}$  in left-circular Stokes space.
